# Supplementary material
Source: Springer Nature journal article supplement (https://www.springerprofessional.de/resource/supplementary/13638_2010_17_MOESM11_ESM.pdf/11897214)

### Control Overhead Vs Speed

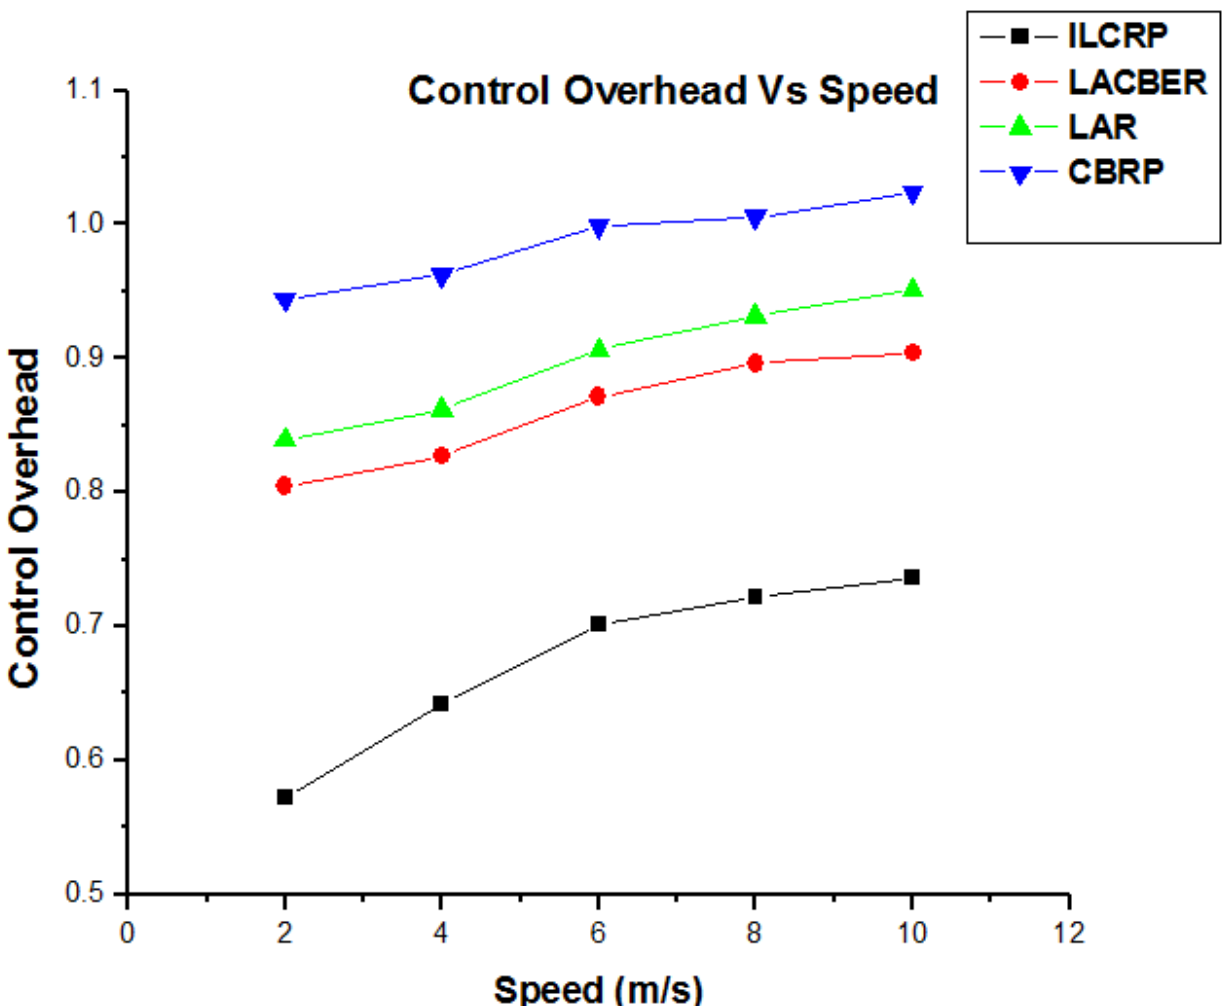

Supplement: MOESM11 [file 11897214]
